# Supplementary material for: Metal-organic framework based on hinged cube tessellation as transformable mechanical metamaterial
Source: PubMed Central journal article supplement — Sci Adv. 2019 May 10;5(5):eaav4119. doi: 10.1126/sciadv.aav4119 (PMC6527257; doi:10.1126/sciadv.aav4119), 2019-05-10

## checkCIF/PLATON report

You have not supplied any structure factors. As a result the full set of tests cannot be run.

THIS REPORT IS FOR GUIDANCE ONLY. IF USED AS PART OF A REVIEW PROCEDURE FOR PUBLICATION, IT SHOULD NOT REPLACE THE EXPERTISE OF AN EXPERIENCED CRYSTALLOGRAPHIC REFEREE.

No syntax errors found.      CIF dictionary      Interpreting this report

### Datablock: new\_sq

---

Bond precision:    C-C = 0.0127 Å                      Wavelength=0.70000

Cell:                      a=30.315(4)              b=30.315(4)              c=34.474(7)  
                            alpha=90              beta=90              gamma=90  
Temperature:              233 K

|                        | Calculated                                       | Reported                          |
|------------------------|--------------------------------------------------|-----------------------------------|
| Volume                 | 31682(11)                                        | 31682(11)                         |
| Space group            | P 4/m n c                                        | P 4/m n c                         |
| Hall group             | -P 4 2n                                          | -P 4 2n                           |
| Moiety formula         | 2(C79 H41.60 N7.40 O17.90<br>Zn5.50) [+ solvent] | ?                                 |
| Sum formula            | C158 H83.20 N14.80 O35.80<br>Zn11 [+ solvent]    | C158 H83.20 N14.80 O35.80<br>Zn11 |
| Mr                     | 3480.89                                          | 3480.66                           |
| Dx, g cm <sup>-3</sup> | 0.730                                            | 0.730                             |
| Z                      | 4                                                | 4                                 |
| Mu (mm <sup>-1</sup> ) | 0.821                                            | 0.821                             |
| F000                   | 7004.8                                           | 7005.0                            |
| F000'                  | 7020.42                                          |                                   |
| h,k,lmax               | 34,34,39                                         | 34,34,39                          |
| Nref                   | 12532                                            | 12473                             |
| Tmin,Tmax              | 0.821,0.863                                      | 0.714,0.866                       |
| Tmin'                  | 0.697                                            |                                   |

Correction method= # Reported T Limits: Tmin=0.714 Tmax=0.866  
AbsCorr = MULTI-SCANS

Data completeness= 0.995                      Theta(max)= 23.500

R(reflections)= 0.1200( 10747)              wR2(reflections)= 0.4320( 12473)

S = 2.059                      Npar= 511

---

The following ALERTS were generated. Each ALERT has the format

**test-name\_ALERT\_alert-type\_alert-level.**

Click on the hyperlinks for more details of the test.

---

### ● Alert level B

THETM01\_ALERT\_3\_B The value of  $\sin(\theta_{\max})/\lambda$  is less than 0.575  
Calculated  $\sin(\theta_{\max})/\lambda = 0.5696$

|                   |      |                                           |      |        |
|-------------------|------|-------------------------------------------|------|--------|
| PLAT084_ALERT_3_B | High | wR2 Value (i.e. > 0.25) .....             | 0.43 | Report |
| PLAT241_ALERT_2_B | High | 'MainMol' Ueq as Compared to Neighbors of | O2   | Check  |
| PLAT241_ALERT_2_B | High | 'MainMol' Ueq as Compared to Neighbors of | O2W  | Check  |
| PLAT241_ALERT_2_B | High | 'MainMol' Ueq as Compared to Neighbors of | O4   | Check  |
| PLAT241_ALERT_2_B | High | 'MainMol' Ueq as Compared to Neighbors of | O6   | Check  |
| PLAT241_ALERT_2_B | High | 'MainMol' Ueq as Compared to Neighbors of | N2   | Check  |
| PLAT241_ALERT_2_B | High | 'MainMol' Ueq as Compared to Neighbors of | N4   | Check  |
| PLAT241_ALERT_2_B | High | 'MainMol' Ueq as Compared to Neighbors of | C23  | Check  |
| PLAT242_ALERT_2_B | Low  | 'MainMol' Ueq as Compared to Neighbors of | Zn5  | Check  |
| PLAT242_ALERT_2_B | Low  | 'MainMol' Ueq as Compared to Neighbors of | C22  | Check  |
| PLAT242_ALERT_2_B | Low  | 'MainMol' Ueq as Compared to Neighbors of | C34  | Check  |

---

### ● Alert level C

ABSMU01\_ALERT\_1\_C The ratio of given/expected absorption coefficient lies  
outside the range 0.99 <> 1.01  
Calculated value of  $\mu = 0.856$   
Value of  $\mu$  given = 0.821

GOODF01\_ALERT\_2\_C The least squares goodness of fit parameter lies  
outside the range 0.80 <> 2.00  
Goodness of fit given = 2.059

RADNW01\_ALERT\_1\_C The radiation wavelength lies outside the expected range  
for the supplied radiation type. Expected range 0.71065-0.71075  
Wavelength given = 0.70000

|                   |                |                                           |      |        |
|-------------------|----------------|-------------------------------------------|------|--------|
| PLAT082_ALERT_2_C | High           | R1 Value .....                            | 0.12 | Report |
| PLAT087_ALERT_2_C | Unsatisfactory | S value (Too High) .....                  | 2.06 | Check  |
| PLAT213_ALERT_2_C | Atom           | O4 has ADP max/min Ratio .....            | 3.5  | prolat |
| PLAT213_ALERT_2_C | Atom           | N4 has ADP max/min Ratio .....            | 3.5  | prolat |
| PLAT213_ALERT_2_C | Atom           | C13 has ADP max/min Ratio .....           | 3.2  | prolat |
| PLAT213_ALERT_2_C | Atom           | C14 has ADP max/min Ratio .....           | 3.2  | prolat |
| PLAT213_ALERT_2_C | Atom           | C19 has ADP max/min Ratio .....           | 3.2  | prolat |
| PLAT213_ALERT_2_C | Atom           | C31 has ADP max/min Ratio .....           | 3.1  | prolat |
| PLAT213_ALERT_2_C | Atom           | C32 has ADP max/min Ratio .....           | 3.1  | prolat |
| PLAT213_ALERT_2_C | Atom           | C33 has ADP max/min Ratio .....           | 3.2  | prolat |
| PLAT213_ALERT_2_C | Atom           | C35 has ADP max/min Ratio .....           | 3.2  | prolat |
| PLAT220_ALERT_2_C | Non-Solvent    | Resd 1 C Ueq(max)/Ueq(min) Range          | 3.4  | Ratio  |
| PLAT220_ALERT_2_C | Non-Solvent    | Resd 1 O Ueq(max)/Ueq(min) Range          | 3.2  | Ratio  |
| PLAT241_ALERT_2_C | High           | 'MainMol' Ueq as Compared to Neighbors of | O1   | Check  |
| PLAT241_ALERT_2_C | High           | 'MainMol' Ueq as Compared to Neighbors of | O3   | Check  |
| PLAT241_ALERT_2_C | High           | 'MainMol' Ueq as Compared to Neighbors of | O5   | Check  |
| PLAT241_ALERT_2_C | High           | 'MainMol' Ueq as Compared to Neighbors of | C2   | Check  |
| PLAT241_ALERT_2_C | High           | 'MainMol' Ueq as Compared to Neighbors of | C7   | Check  |
| PLAT241_ALERT_2_C | High           | 'MainMol' Ueq as Compared to Neighbors of | C14  | Check  |
| PLAT241_ALERT_2_C | High           | 'MainMol' Ueq as Compared to Neighbors of | C16  | Check  |
| PLAT241_ALERT_2_C | High           | 'MainMol' Ueq as Compared to Neighbors of | C17  | Check  |
| PLAT241_ALERT_2_C | High           | 'MainMol' Ueq as Compared to Neighbors of | C32  | Check  |
| PLAT241_ALERT_2_C | High           | 'MainMol' Ueq as Compared to Neighbors of | C33  | Check  |
| PLAT241_ALERT_2_C | High           | 'MainMol' Ueq as Compared to Neighbors of | C35  | Check  |
| PLAT242_ALERT_2_C | Low            | 'MainMol' Ueq as Compared to Neighbors of | Zn2  | Check  |
| PLAT242_ALERT_2_C | Low            | 'MainMol' Ueq as Compared to Neighbors of | N1P  | Check  |
| PLAT242_ALERT_2_C | Low            | 'MainMol' Ueq as Compared to Neighbors of | C12  | Check  |
| PLAT242_ALERT_2_C | Low            | 'MainMol' Ueq as Compared to Neighbors of | C13  | Check  |
| PLAT242_ALERT_2_C | Low            | 'MainMol' Ueq as Compared to Neighbors of | C15  | Check  |

|                   |       |                                       |                                 |         |          |
|-------------------|-------|---------------------------------------|---------------------------------|---------|----------|
| PLAT242_ALERT_2_C | Low   | 'MainMol'                             | Ueq as Compared to Neighbors of | C18     | Check    |
| PLAT242_ALERT_2_C | Low   | 'MainMol'                             | Ueq as Compared to Neighbors of | C19     | Check    |
| PLAT242_ALERT_2_C | Low   | 'MainMol'                             | Ueq as Compared to Neighbors of | C20     | Check    |
| PLAT242_ALERT_2_C | Low   | 'MainMol'                             | Ueq as Compared to Neighbors of | C24     | Check    |
| PLAT242_ALERT_2_C | Low   | 'MainMol'                             | Ueq as Compared to Neighbors of | C29     | Check    |
| PLAT250_ALERT_2_C | Large | U3/U1 Ratio for Average U(i,j) Tensor | ....                            | 2.4     | Note     |
| PLAT341_ALERT_3_C | Low   | Bond Precision on C-C Bonds           | .....                           | 0.01271 | Ang.     |
| PLAT368_ALERT_2_C | Short | C(sp2)-C(sp2) Bond                    | C27 - C27_k ..                  | 1.20    | Ang.     |
| PLAT369_ALERT_2_C | Long  | C(sp2)-C(sp2) Bond                    | C18 - C34_a ..                  | 1.55    | Ang.     |
| PLAT731_ALERT_1_C | Bond  | Calc                                  | 1.549(14), Rep 1.55(7) .....    | 5       | su-Rat   |
|                   | C34   | -C18                                  | 1.555 6.465 .....               | #       | 77 Check |

### Alert level G

ABSTY01\_ALERT\_1\_G Extra text has been found in the \_exptl\_absorpt\_correction\_type field, which should be only a single keyword. A literature citation should be included in the \_exptl\_absorpt\_process\_details field.

|                   |                                                    |         |              |
|-------------------|----------------------------------------------------|---------|--------------|
| PLAT002_ALERT_2_G | Number of Distance or Angle Restraints on AtSite   | 4       | Note         |
| PLAT003_ALERT_2_G | Number of Uiso or Uij Restrained non-H Atoms ...   | 14      | Report       |
| PLAT004_ALERT_5_G | Polymeric Structure Found with Maximum Dimension   | 3       | Info         |
| PLAT068_ALERT_1_G | Reported F000 Differs from Calcd (or Missing)...   |         | Please Check |
| PLAT072_ALERT_2_G | SHELXL First Parameter in WGHT Unusually Large     | 0.20    | Report       |
| PLAT092_ALERT_4_G | Check: Wavelength given is not Cu,Ga,Mo,Ag,In Ka   | 0.70000 | Ang.         |
| PLAT172_ALERT_4_G | The CIF-Embedded .res File Contains DFIX Records   | 3       | Report       |
| PLAT173_ALERT_4_G | The CIF-Embedded .res File Contains DANG Records   | 3       | Report       |
| PLAT174_ALERT_4_G | The CIF-Embedded .res File Contains FLAT Records   | 2       | Report       |
| PLAT177_ALERT_4_G | The CIF-Embedded .res File Contains DELU Records   | 3       | Report       |
| PLAT178_ALERT_4_G | The CIF-Embedded .res File Contains SIMU Records   | 3       | Report       |
| PLAT186_ALERT_4_G | The CIF-Embedded .res File Contains ISOR Records   | 4       | Report       |
| PLAT300_ALERT_4_G | Atom Site Occupancy of Zn4 is Constrained at       | 0.55    | Check        |
| PLAT300_ALERT_4_G | Atom Site Occupancy of Zn3 is Constrained at       | 0.45    | Check        |
| PLAT300_ALERT_4_G | Atom Site Occupancy of O1W is Constrained at       | 0.45    | Check        |
| PLAT300_ALERT_4_G | Atom Site Occupancy of C1P is Constrained at       | 0.5     | Check        |
| PLAT300_ALERT_4_G | Atom Site Occupancy of C2P is Constrained at       | 0.5     | Check        |
| PLAT300_ALERT_4_G | Atom Site Occupancy of N2P is Constrained at       | 0.45    | Check        |
| PLAT300_ALERT_4_G | Atom Site Occupancy of C4P is Constrained at       | 0.45    | Check        |
| PLAT300_ALERT_4_G | Atom Site Occupancy of C5P is Constrained at       | 0.45    | Check        |
| PLAT300_ALERT_4_G | Atom Site Occupancy of C6P is Constrained at       | 0.45    | Check        |
| PLAT300_ALERT_4_G | Atom Site Occupancy of C7P is Constrained at       | 0.45    | Check        |
| PLAT300_ALERT_4_G | Atom Site Occupancy of C8P is Constrained at       | 0.45    | Check        |
| PLAT300_ALERT_4_G | Atom Site Occupancy of H1P is Constrained at       | 0.5     | Check        |
| PLAT300_ALERT_4_G | Atom Site Occupancy of H2P is Constrained at       | 0.5     | Check        |
| PLAT300_ALERT_4_G | Atom Site Occupancy of H4P is Constrained at       | 0.45    | Check        |
| PLAT300_ALERT_4_G | Atom Site Occupancy of H5P is Constrained at       | 0.45    | Check        |
| PLAT300_ALERT_4_G | Atom Site Occupancy of H7P is Constrained at       | 0.45    | Check        |
| PLAT300_ALERT_4_G | Atom Site Occupancy of H8P is Constrained at       | 0.45    | Check        |
| PLAT301_ALERT_3_G | Main Residue Disorder .....(Resd 1)..              | 9%      | Note         |
| PLAT367_ALERT_2_G | Long? C(sp?)-C(sp?) Bond C3P - C3P_h ..            | 1.53    | Ang.         |
| PLAT606_ALERT_4_G | VERY LARGE Solvent Accessible VOID(S) in Structure |         | ! Info       |
| PLAT779_ALERT_4_G | Suspect or Irrelevant (Bond) Angle in CIF .... #   | 150     | Check        |
|                   | ZN4 -O2 -ZN3 1.555 1.555 1.555                     | 28.20   | Deg.         |
| PLAT779_ALERT_4_G | Suspect or Irrelevant (Bond) Angle in CIF .... #   | 154     | Check        |
|                   | ZN3 -O4 -ZN4 1.555 1.555 1.555                     | 20.91   | Deg.         |
| PLAT779_ALERT_4_G | Suspect or Irrelevant (Bond) Angle in CIF .... #   | 158     | Check        |
|                   | ZN4 -O6 -ZN3 1.555 1.555 1.555                     | 22.01   | Deg.         |
| PLAT779_ALERT_4_G | Suspect or Irrelevant (Bond) Angle in CIF .... #   | 192     | Check        |
|                   | ZN4 -O2W -ZN3 1.555 1.555 1.555                    | 29.88   | Deg.         |
| PLAT860_ALERT_3_G | Number of Least-Squares Restraints .....           | 153     | Note         |
| PLAT869_ALERT_4_G | ALERTS Related to the use of SQUEEZE Suppressed    |         | ! Info       |

0 **ALERT level A** = Most likely a serious problem - resolve or explain  
12 **ALERT level B** = A potentially serious problem, consider carefully  
42 **ALERT level C** = Check. Ensure it is not caused by an omission or oversight  
39 **ALERT level G** = General information/check it is not something unexpected

5 ALERT type 1 CIF construction/syntax error, inconsistent or missing data  
52 ALERT type 2 Indicator that the structure model may be wrong or deficient  
5 ALERT type 3 Indicator that the structure quality may be low  
30 ALERT type 4 Improvement, methodology, query or suggestion  
1 ALERT type 5 Informative message, check

---

---

It is advisable to attempt to resolve as many as possible of the alerts in all categories. Often the minor alerts point to easily fixed oversights, errors and omissions in your CIF or refinement strategy, so attention to these fine details can be worthwhile. In order to resolve some of the more serious problems it may be necessary to carry out additional measurements or structure refinements. However, the purpose of your study may justify the reported deviations and the more serious of these should normally be commented upon in the discussion or experimental section of a paper or in the "special\_details" fields of the CIF. checkCIF was carefully designed to identify outliers and unusual parameters, but every test has its limitations and alerts that are not important in a particular case may appear. Conversely, the absence of alerts does not guarantee there are no aspects of the results needing attention. It is up to the individual to critically assess their own results and, if necessary, seek expert advice.

### **Publication of your CIF in IUCr journals**

A basic structural check has been run on your CIF. These basic checks will be run on all CIFs submitted for publication in IUCr journals (*Acta Crystallographica*, *Journal of Applied Crystallography*, *Journal of Synchrotron Radiation*); however, if you intend to submit to *Acta Crystallographica Section C* or *E* or *IUCrData*, you should make sure that full publication checks are run on the final version of your CIF prior to submission.

### **Publication of your CIF in other journals**

Please refer to the *Notes for Authors* of the relevant journal for any special instructions relating to CIF submission.

---

**PLATON version of 13/08/2017; check.def file version of 27/07/2017**

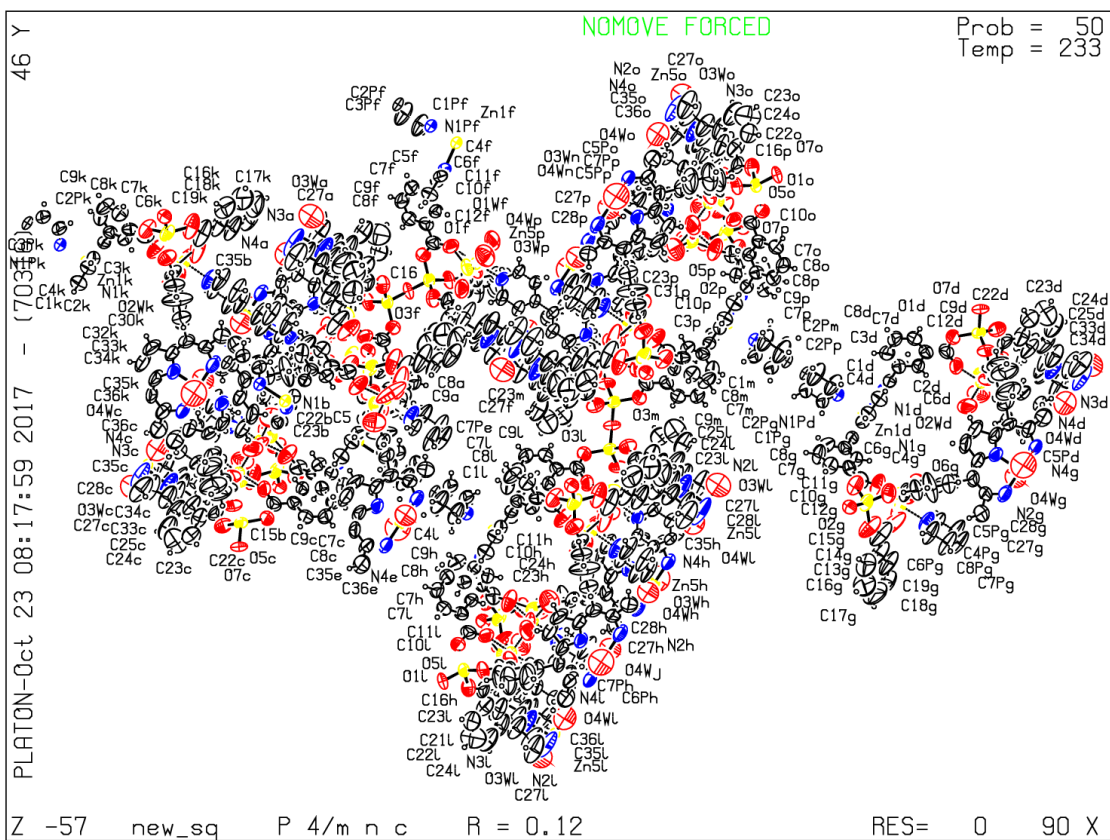

Supplement: aav4119_Data_file_S10.pdf [file aav4119_Data_file_S10.pdf]
